# Supplementary material for: Analysis of the Factors Influencing the Spatial Distribution of PM2.5 Concentrations (SDG 11.6.2) at the Provincial Scale in China
Source: MDPI journal article supplement (doi:10.3390/su16083394), 2024-04-18
Supplement: s1 [file s1]

## Supplementary Figures:

# Analysis of the factors influencing the spatial distribution of PM2.5 concentrations (SDG 11.6.2) at the provincial scale in China

Jun Li<sup>1,2</sup>, Yu Chen<sup>2,3,\*</sup>, Fang Chen<sup>2,3</sup>

<sup>1</sup> Guilin University of Technology, Guilin 541006, China

<sup>2</sup> International Research Center of Big Data for Sustainable Development Goals, Beijing 100094, China

<sup>3</sup> Key Laboratory of Digital Earth Science, Aerospace Information Research Institute, Chinese Academy of Sciences, Beijing 100094, China

\* Correspondence: chenyu@radi.ac.cn

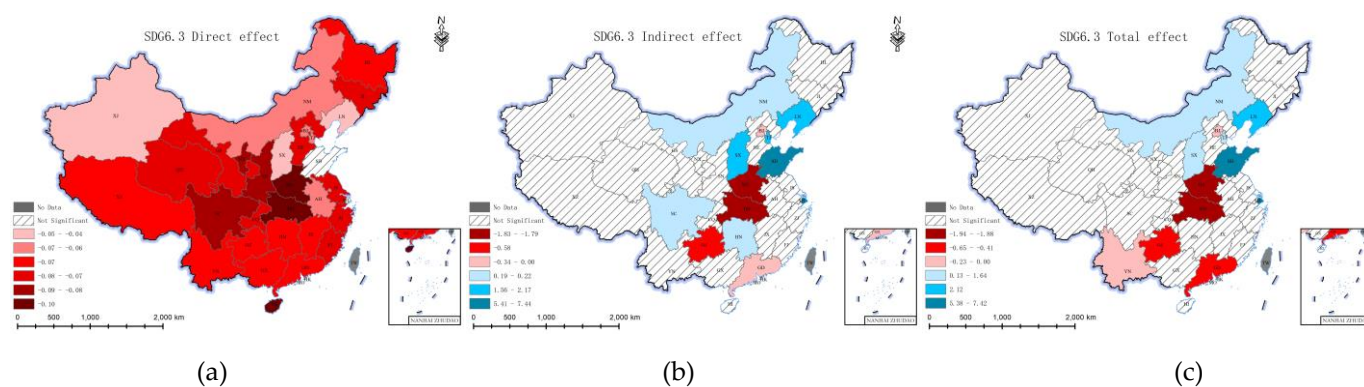

Figure S1. Direct effect (a), indirect effect(b), and total effect (c) for SDG6.3 (Water quality) on the dependent variable SDG11.6.2 (PM2.5 concentration)

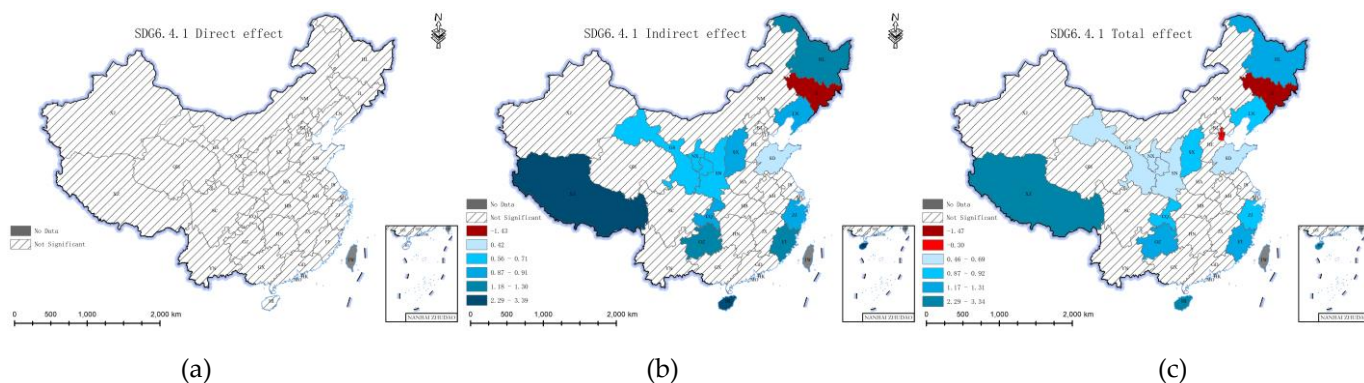

Figure S2. Direct effect (a), indirect effect(b), and total effect (c) for SDG6.4.1 (Water-use efficiency) on the dependent variable SDG11.6.2 (PM2.5 concentration)

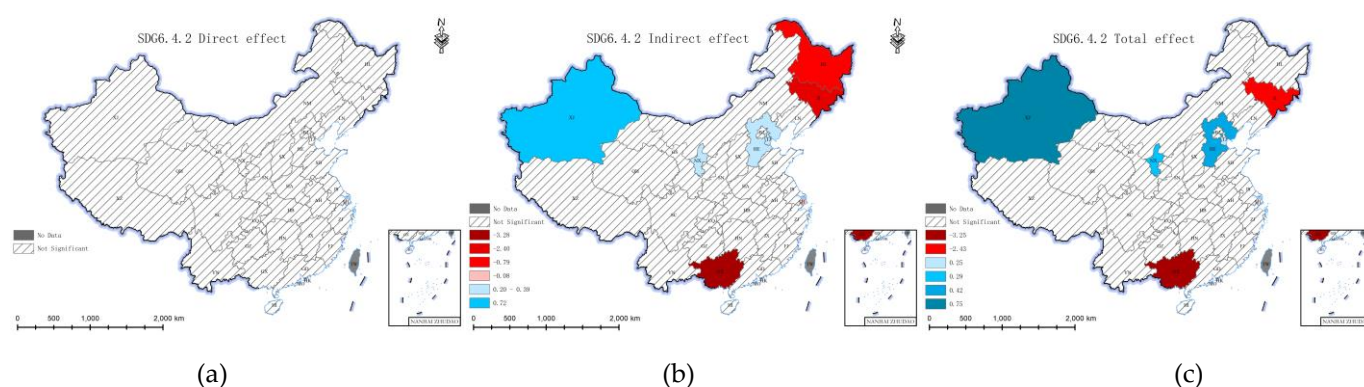

Figure S3. Direct effect (a), indirect effect(b), and total effect (c) for SDG6.4.2 (Water stress) on the dependent variable SDG11.6.2 (PM2.5 concentration)

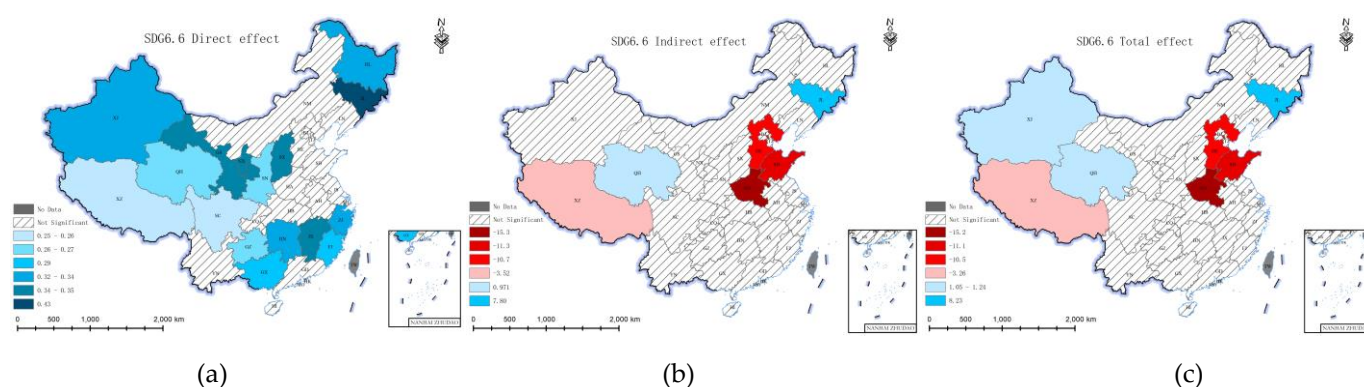

Figure S4. Direct effect (a), indirect effect(b), and total effect (c) for SDG6.6 (Water-related ecosystems) on the dependent variable SDG11.6.2 (PM2.5 concentration)

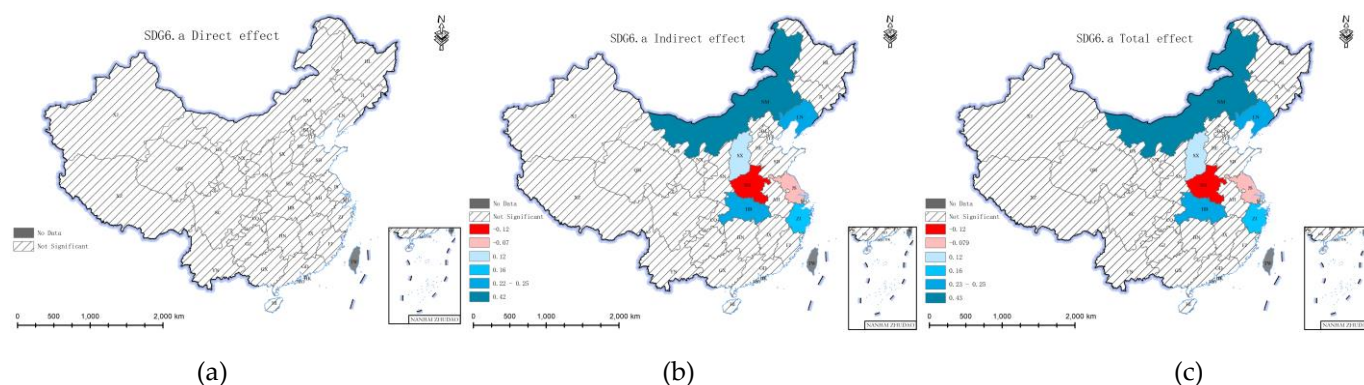

Figure S5. Direct effect (a), indirect effect(b), and total effect (c) for SDG6.a (Wastewater treatment, recycling and reuse) on the dependent variable SDG11.6.2 (PM2.5 concentration)

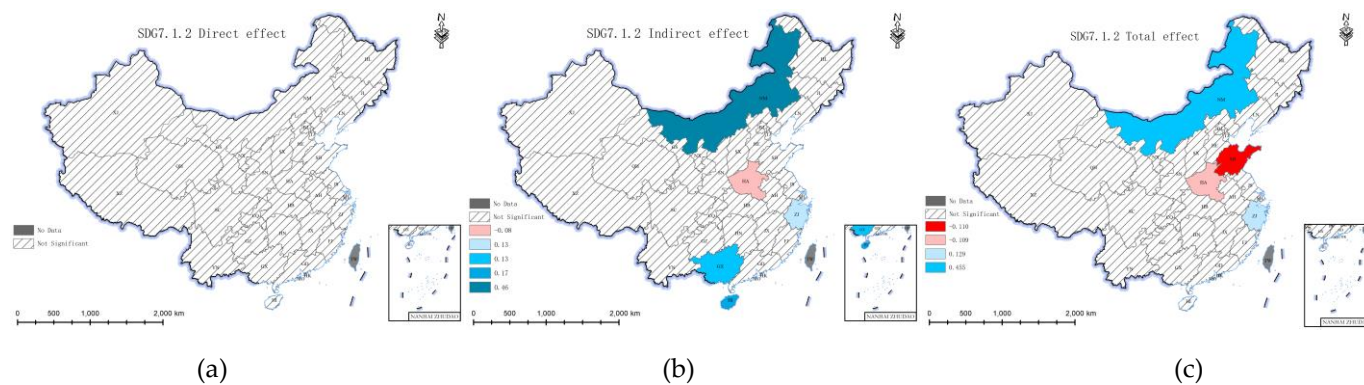

Figure S6. Direct effect (a), indirect effect(b), and total effect (c) for SDG7.1.2 (Reliance on clean energy) on the dependent variable SDG11.6.2 (PM2.5 concentration)

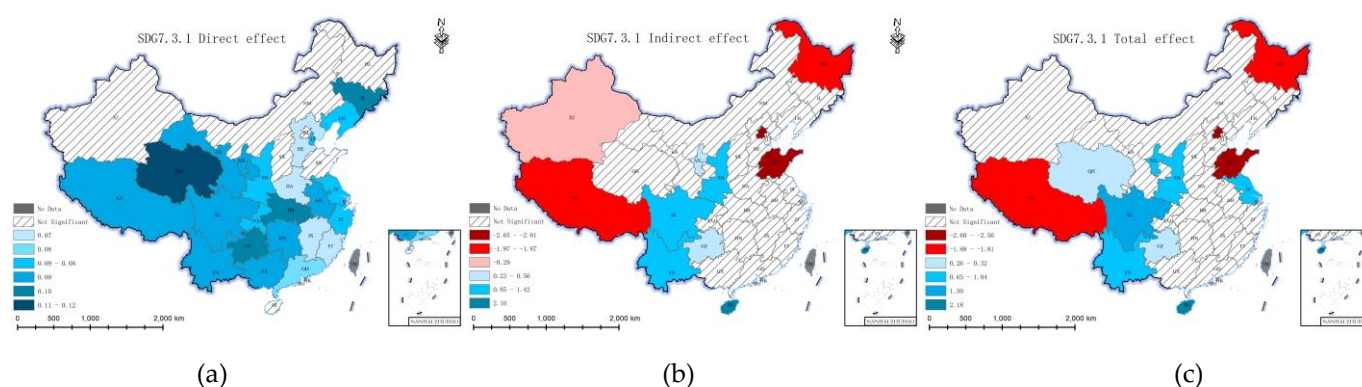

Figure S7. Direct effect (a), indirect effect(b), and total effect (c) for SDG7.3.1 (Energy intensity) on the dependent variable SDG11.6.2 (PM2.5 concentration)

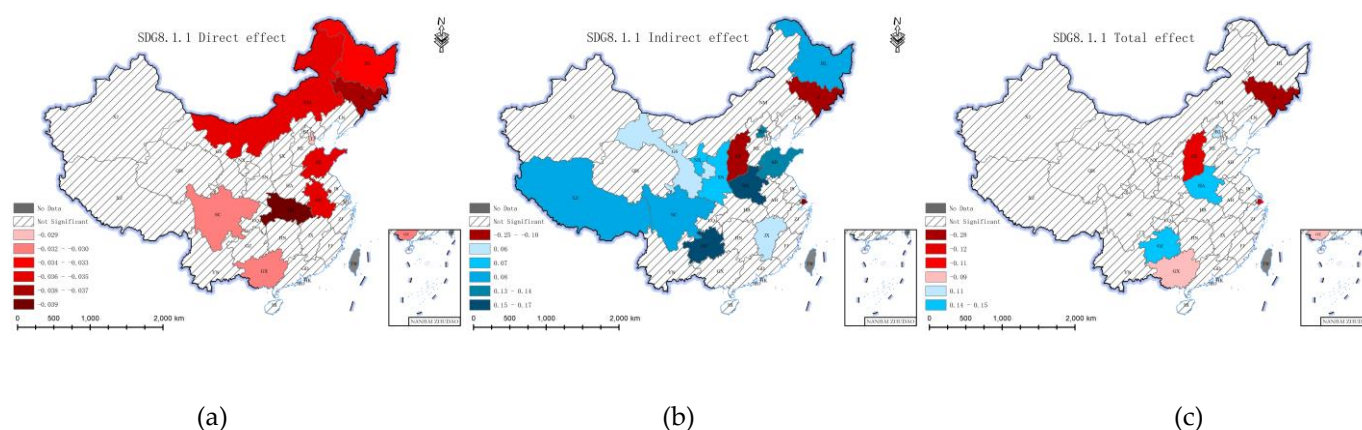

Figure S8. Direct effect (a), indirect effect(b), and total effect (c) for SDG8.1.1 (Real GDP per capita growth rate) on the dependent variable SDG11.6.2 (PM2.5 concentration)

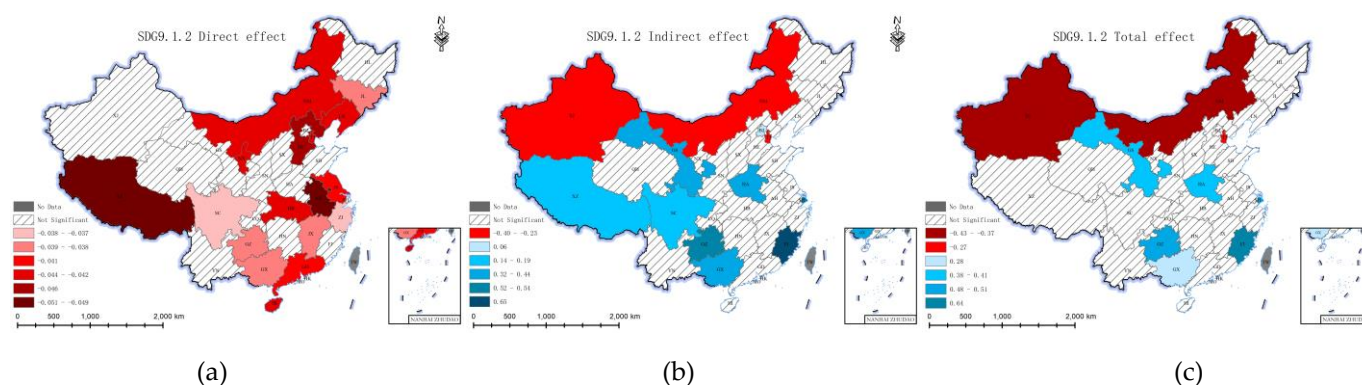

Figure S9. Direct effect (a), indirect effect(b), and total effect (c) for SDG9.1.2 (Passenger and freight volume) on the dependent variable SDG11.6.2 (PM2.5 concentration)

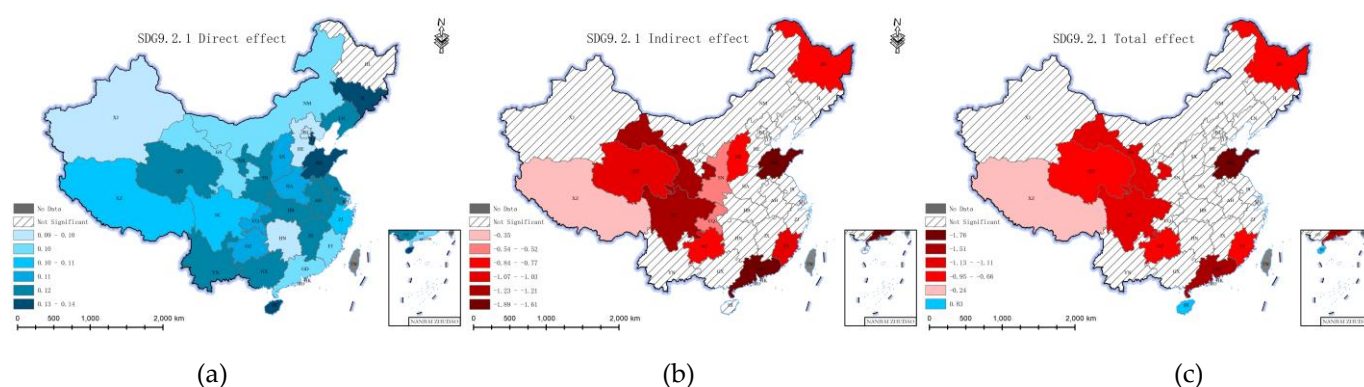

Figure S10. Direct effect (a), indirect effect(b), and total effect (c) for SDG9.2.1 (Manufacturing value added) on the dependent variable SDG11.6.2 (PM2.5 concentration)

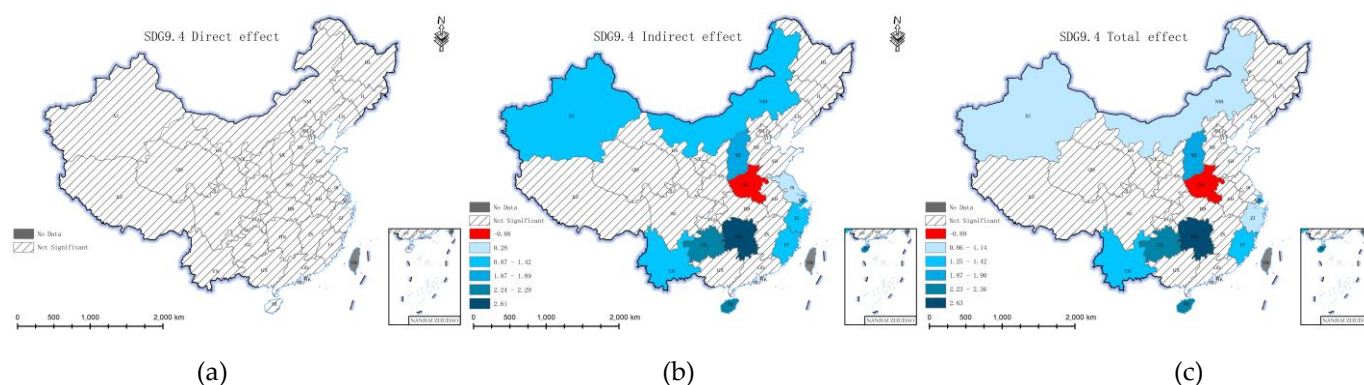

Figure S11. Direct effect (a), indirect effect(b), and total effect (c) for SDG9.4 (Sustainable & clean industries) on the dependent variable SDG11.6.2 (PM2.5 concentration)

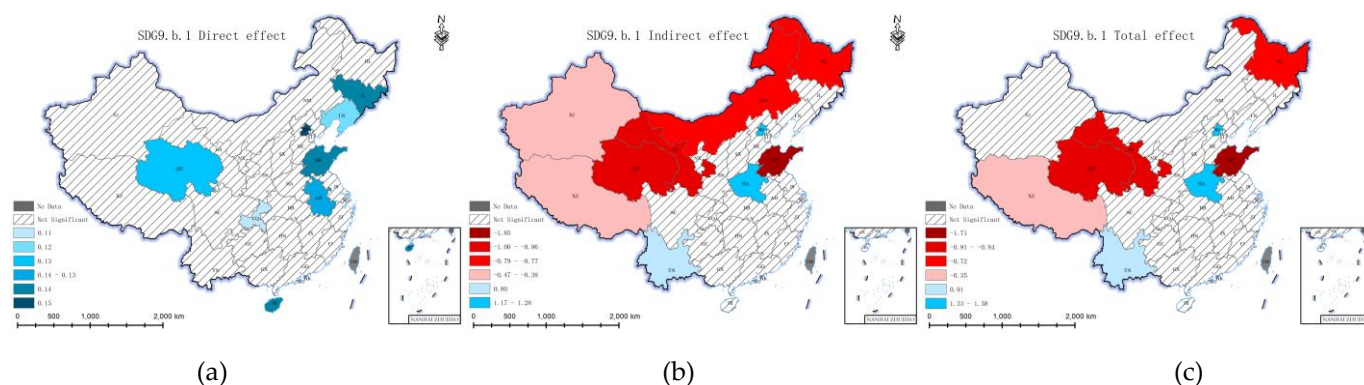

Figure S12. Direct effect (a), indirect effect(b), and total effect (c) for SDG9.b.1 (Medium and high-tech industry value added) on the dependent variable SDG11.6.2 (PM2.5 concentration)

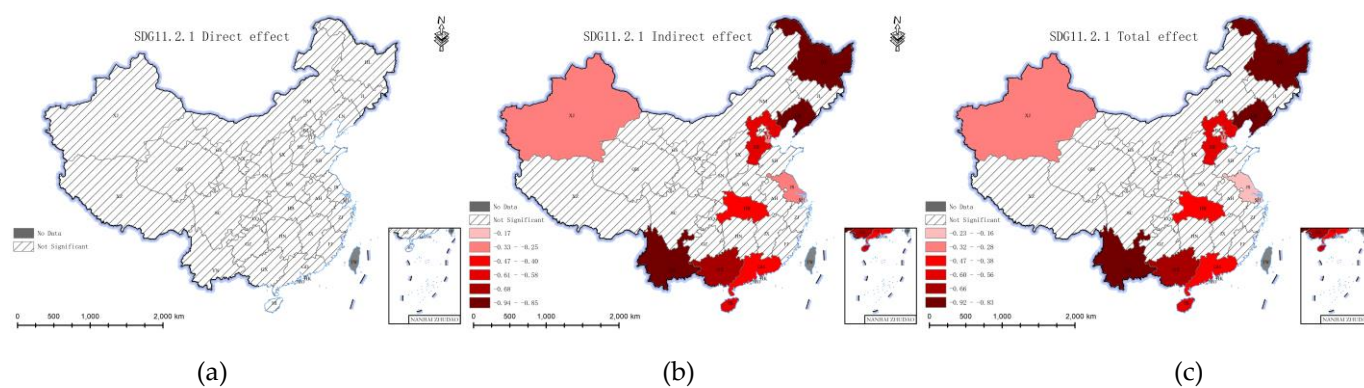

Figure S13. Direct effect (a), indirect effect(b), and total effect (c) for SDG11.2.1 (Convenient access to public transport) on the dependent variable SDG11.6.2 (PM2.5 concentration)

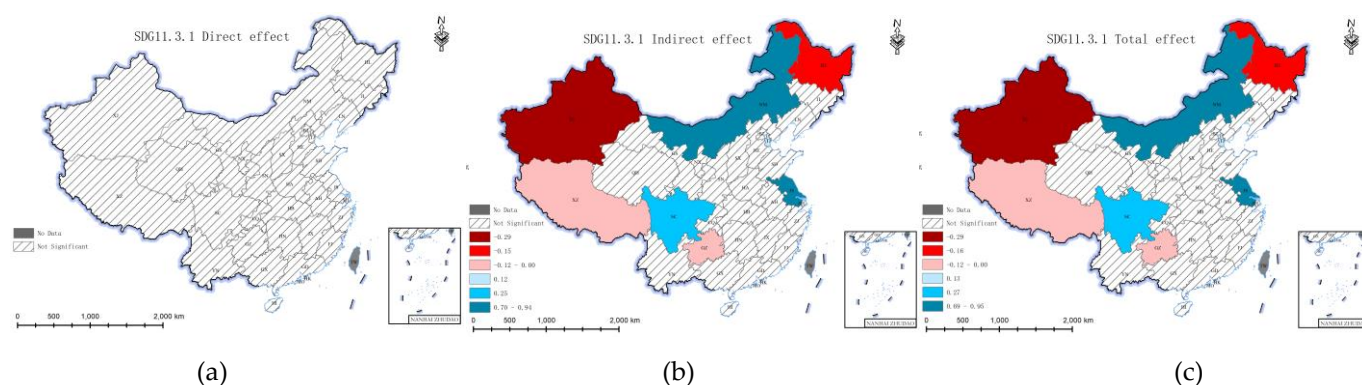

Figure S14. Direct effect (a), indirect effect(b), and total effect (c) for SDG11.3.1 (Land consumption) on the dependent variable SDG11.6.2 (PM2.5 concentration)

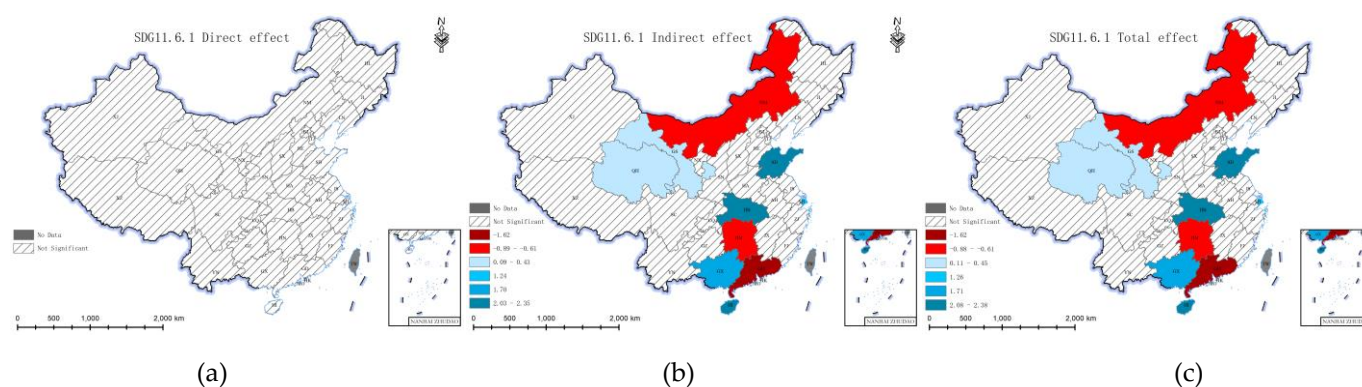

Figure S15. Direct effect (a), indirect effect(b), and total effect (c) for SDG11.6.1 (Municipal solid waste) on the dependent variable SDG11.6.2 (PM2.5 concentration)

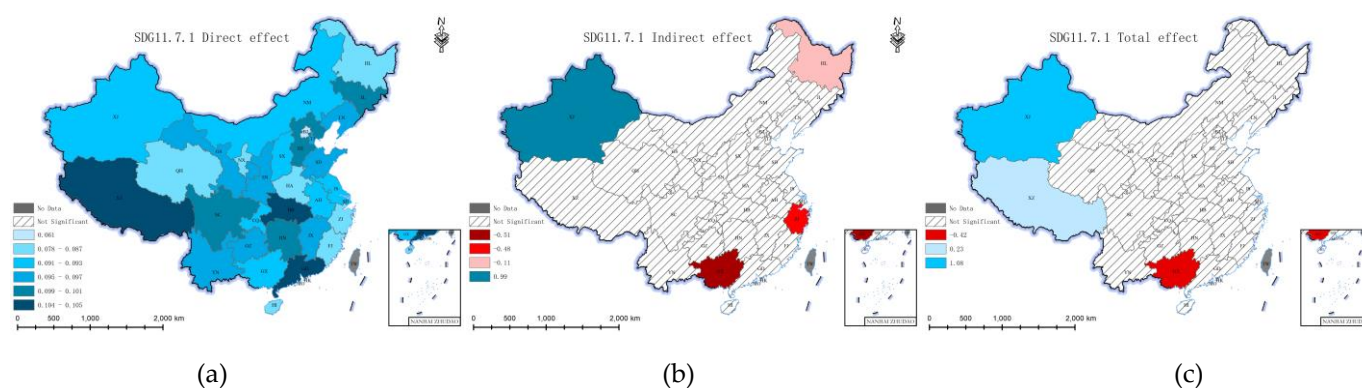

Figure S16. Direct effect (a), indirect effect(b), and total effect (c) for SDG11.7.1 (Open space for public use) on the dependent variable SDG11.6.2 (PM2.5 concentration)

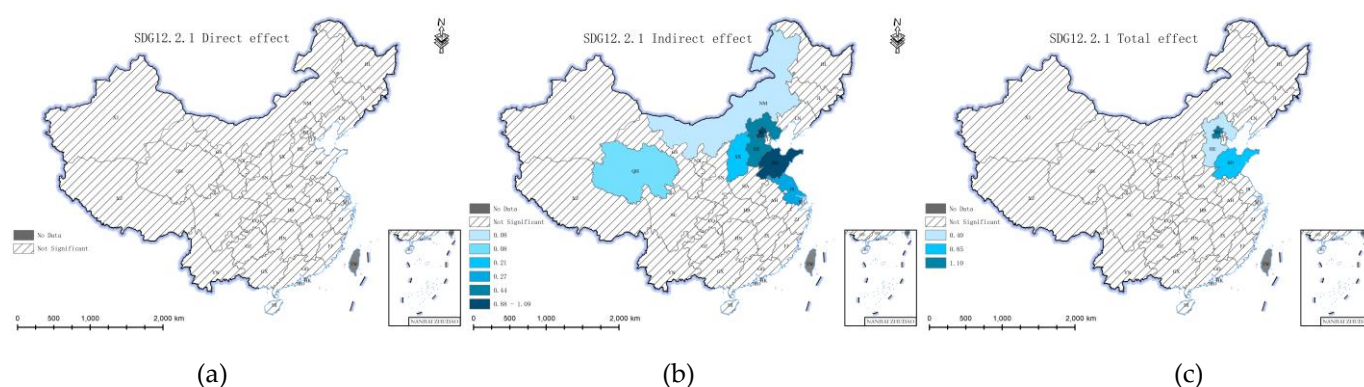

Figure S17. Direct effect (a), indirect effect(b), and total effect (c) for SDG12.2.1 (Material footprint) on the dependent variable SDG11.6.2 (PM2.5 concentration)

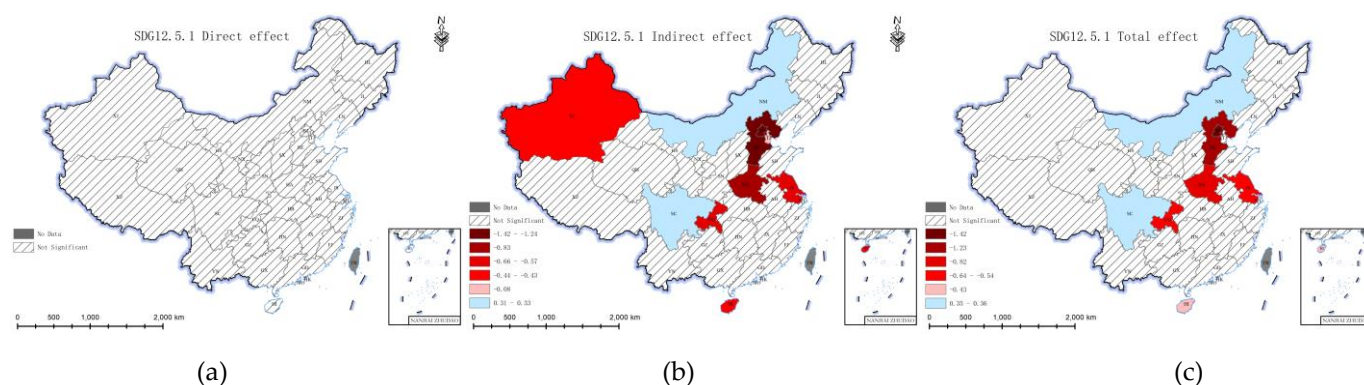

Figure S18. Direct effect (a), indirect effect(b), and total effect (c) for SDG12.5.1 (National recycling rate) on the dependent variable SDG11.6.2 (PM2.5 concentration)

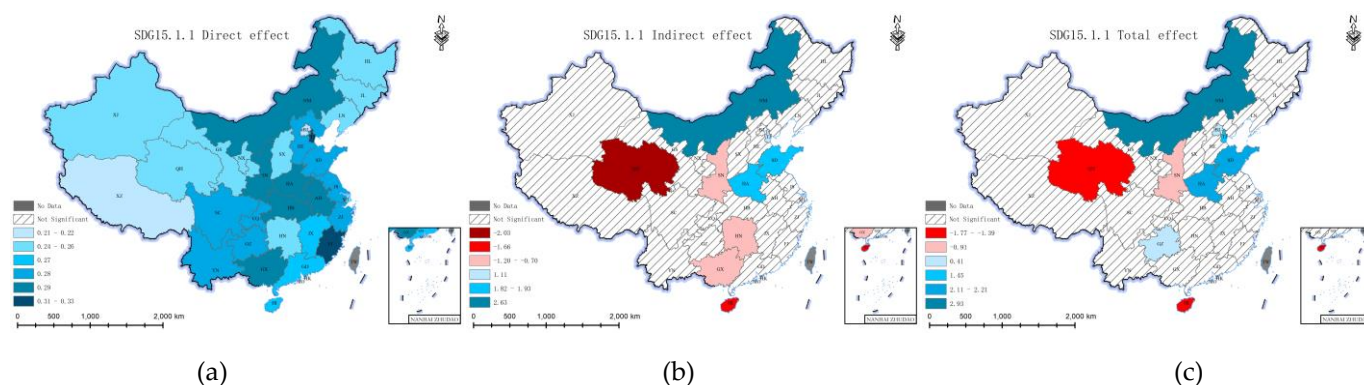

Figure S19. Direct effect (a), indirect effect(b), and total effect (c) for SDG15.1.1 (Forest area) on the dependent variable SDG11.6.2 (PM2.5 concentration)

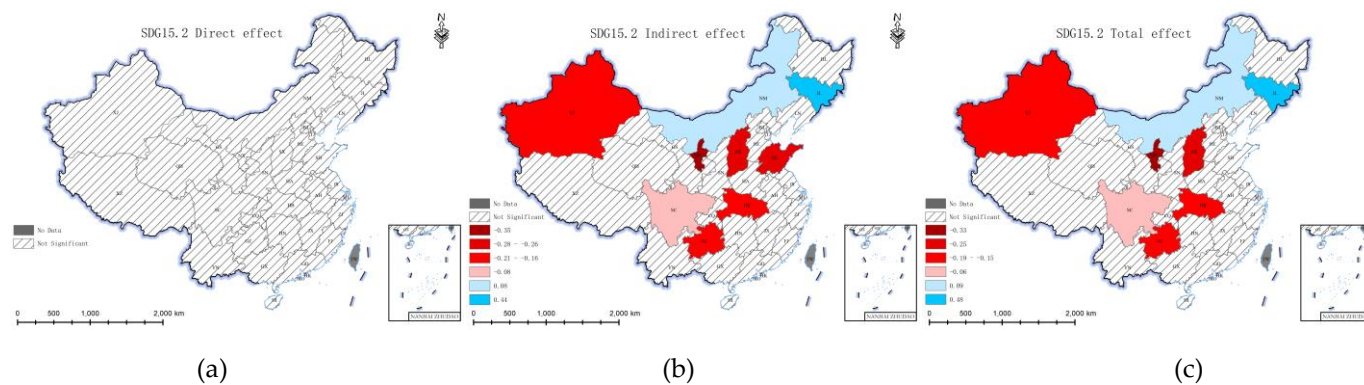

Figure S20. Direct effect (a), indirect effect(b), and total effect (c) for SDG15.2 (Sustainable forests management) on the dependent variable SDG11.6.2 (PM2.5 concentration)

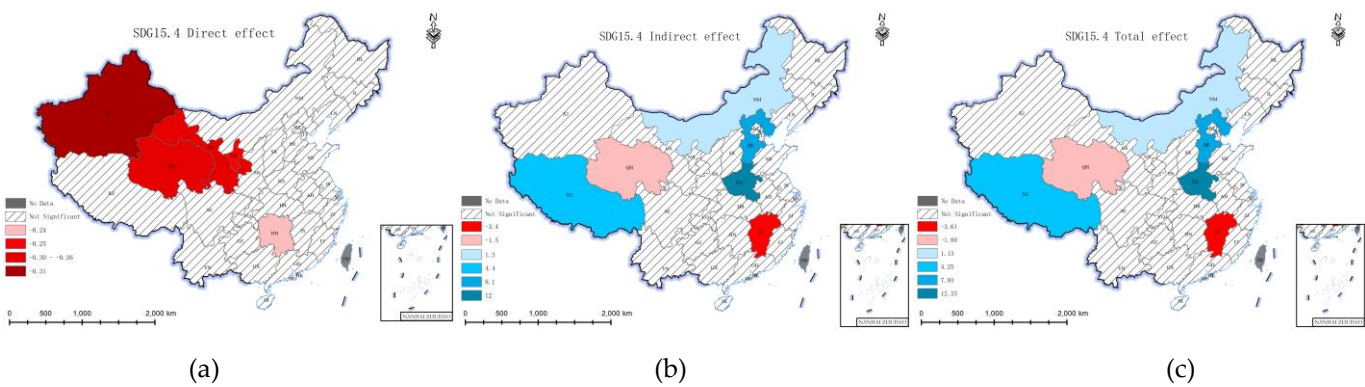

Figure S21. Direct effect (a), indirect effect(b), and total effect (c) for SDG15.4 (Conservation of mountain ecosystems) on the dependent variable SDG11.6.2 (PM2.5 concentration)
